# Supplementary material
Source: ML conference proceedings conference paper supplement (https://openaccess.thecvf.com/content/cvpr_2016/html/Dai_Rolling_Shutter_Camera_2016_CVPR_paper.html)
Supplement: Supplementary file 1 [file Dai_Rolling_Shutter_Camera_2016_CVPR_supplemental.pdf]

# Rolling Shutter Camera Relative Pose: Generalized Epipolar Geometry Supplementary Material

Yuchao Dai<sup>1</sup>, Hongdong Li<sup>1,2</sup> and Laurent Kneip<sup>1,2</sup>

<sup>1</sup> Research School of Engineering, Australian National University

<sup>2</sup>ARC Centre of Excellence for Robotic Vision (ACRV)

## Abstract

In this supplementary material, we provide detailed derivations of other types of rolling shutter essential matrices as well as their linear algorithms.

## 1. Deriving the $7 \times 7$ rolling shutter essential matrix for uniform RS camera

Under the uniform rolling shutter camera model, the scanline coplanarity constraint can be expressed as:

$$[u'_i, v'_i, 1][\mathbf{t} + u'_i \mathbf{d}_2 - u_i \mathbf{R}_{u_i u'_i} \mathbf{d}_1] \times \mathbf{R}_{u_i u'_i} [u_i, v_i, 1]^T = 0, \quad (1)$$

where  $\mathbf{R}_{u_i, u'_i}$  defines the relative rotation while  $\mathbf{t}_{u_i, u'_i} = \mathbf{t} + u'_i \mathbf{d}_2 - u_i \mathbf{R}_{u_i u'_i} \mathbf{d}_1$  defines the relative translation. where  $\mathbf{R}$  defines the rotation between the central row of the second frame to the central row of the first row.

$$[u'_i, v'_i, 1](\mathbf{t} \times \mathbf{R}_{u_i, u'_i} \quad (2)$$

$$- u_i \mathbf{R}_{u_i, u'_i} [\mathbf{d}_1] \times \quad (3)$$

$$- u'_i [\mathbf{d}_2] \times \mathbf{R}_{u_i, u'_i}) [u_i, v_i, 1]^T = 0, \quad (4)$$

Expanding this equation with the aid of the small rotation approximation results in

$$\mathbf{R}_{u_i, u'_i} = (\mathbf{I} + u'_i [\mathbf{w}_2] \times) \mathbf{R}_0 (\mathbf{I} - u_i [\mathbf{w}_1] \times), \quad (5)$$

By defining the following auxiliary variables,

$$\begin{aligned} \mathbf{E}_0 &= [\mathbf{t}] \times \mathbf{R}, \\ \mathbf{E}_1 &= \mathbf{R}[\mathbf{d}_1] \times + [\mathbf{t}] \times \mathbf{R}[\mathbf{w}_1] \times, \\ \mathbf{E}_2 &= [\mathbf{d}_2] \times \mathbf{R} + [\mathbf{t}] \times [\mathbf{w}_2] \times \mathbf{R}, \\ \mathbf{E}_3 &= \mathbf{R}[\mathbf{w}_1] \times [\mathbf{d}_1] \times, \\ \mathbf{E}_4 &= [\mathbf{d}_2] \times \mathbf{R}[\mathbf{w}_1] \times + [\mathbf{w}_2] \times \mathbf{R}[\mathbf{d}_1] \times + [\mathbf{t}] \times [\mathbf{w}_2] \times \mathbf{R}[\mathbf{w}_1] \times, \\ \mathbf{E}_5 &= [\mathbf{d}_2] \times [\mathbf{w}_2] \times \mathbf{R}, \\ \mathbf{E}_6 &= [\mathbf{w}_2] \times \mathbf{R}[\mathbf{w}_1] \times [\mathbf{d}_1] \times, \\ \mathbf{E}_7 &= [\mathbf{d}_2] \times [\mathbf{w}_2] \times \mathbf{R}[\mathbf{w}_1] \times, \end{aligned} \quad (6)$$

we arrive that,

$$[u'_i, v'_i, 1](\mathbf{E}_0 - u_i \mathbf{E}_1 + u'_i \mathbf{E}_2 + u_i^2 \mathbf{E}_3 \quad (7)$$

$$- u_i u'_i \mathbf{E}_4 + u'_i \mathbf{E}_5 \quad (8)$$

$$+ u_i^2 u'_i \mathbf{E}_6 - u_i u_i'^2 \mathbf{E}_7) [u_i, v_i, 1]^T = 0. \quad (9)$$

Finally we obtain:

$$[u_i'^3, u_i'^2 v_i', u_i'^2, u_i' v_i', u_i', v_i', 1] \mathbf{F} [u_i^3, u_i^2 v_i, u_i^2, u_i v_i, u_i, v_i, 1]^T = 0, \quad (10)$$

where

$$\mathbf{F} = \begin{bmatrix} 0 & 0 & f_{13} & f_{14} & f_{15} & f_{16} & f_{17} \\ 0 & 0 & f_{23} & f_{24} & f_{25} & f_{26} & f_{27} \\ f_{31} & f_{32} & f_{33} & f_{34} & f_{35} & f_{36} & f_{37} \\ f_{41} & f_{42} & f_{43} & f_{44} & f_{45} & f_{46} & f_{47} \\ f_{51} & f_{52} & f_{53} & f_{54} & f_{55} & f_{56} & f_{57} \\ f_{61} & f_{62} & f_{63} & f_{64} & f_{65} & f_{66} & f_{67} \\ f_{71} & f_{72} & f_{73} & f_{74} & f_{75} & f_{76} & f_{77} \end{bmatrix}.$$

This gives a  $7 \times 7$  uniform RS essential matrix  $\mathbf{F}$ , whose elements are functions of the 18 unknowns (*i.e.*  $\{\mathbf{R}, \mathbf{t}, \mathbf{w}_1, \mathbf{w}_2, \mathbf{d}_1, \mathbf{d}_2\}$ ). Also note the induced epipolar curves are *cubic*.

In total there are 45 homogeneous variables, thus minimum 44 points in general configuration are sufficient to solve this  $7 \times 7$  RS essential matrix.

### 1.1. Detail of the linear 44-point solver

For the uniform rolling shutter relative pose problem, we first solve for the uniform rolling shutter essential matrix  $\mathbf{F} \in \mathbb{R}^{7 \times 7}$ . Then from the 45 elements in  $\mathbf{F}$ , recover the eight matrices  $\mathbf{E}_i, i = 0, \dots, 7$ . Finally, the relative pose  $(\mathbf{R}, \mathbf{t})$ , rotational velocities  $\mathbf{w}_1, \mathbf{w}_2$  and translational velocities  $\mathbf{d}_1, \mathbf{d}_2$  are extracted from the eight matrices.

Due to its special structure, the uniform RS essential matrix  $\mathbf{F}$  consists of 45 homogeneous variables, *i.e.*, 44 DoF. According to the uniform RS essential matrix Eq.-(10), by collecting 44 correspondences, we can solve for the uniform RS essential matrix  $\mathbf{M}$  linearly through the singular value decomposition (SVD).

$$\mathbf{F} = \begin{bmatrix} 0 & 0 & E_6^{11} & E_6^{21} & E_6^{31} + E_3^{11} & E_3^{21} & E_3^{31} \\ 0 & 0 & E_6^{12} & E_6^{22} & E_6^{32} + E_3^{12} & E_3^{22} & E_3^{32} \\ -E_7^{11} & -E_7^{21} & E_6^{13} - E_4^{11} - E_7^{31} & E_6^{23} - E_4^{21} & E_3^{13} - E_5^{11} - E_4^{31} + E_6^{33} & E_3^{23} - E_1^{21} & E_3^{33} - E_1^{31} \\ -E_7^{12} & -E_7^{22} & -E_4^{12} - E_7^{32} & -E_4^{22} & -E_5^{12} - E_4^{32} & -E_1^{22} & -E_1^{32} \\ E_5^{11} - E_7^{13} & E_5^{21} - E_7^{23} & E_2^{11} - E_4^{13} + E_5^{31} - E_7^{33} & E_2^{21} - E_4^{23} & E_0^{11} - E_1^{13} + E_2^{31} - E_4^{33} & E_0^{21} - E_1^{23} & E_0^{31} - E_1^{33} \\ E_5^{12} & E_5^{22} & E_2^{12} + E_5^{32} & E_2^{22} & E_0^{12} + E_2^{32} & E_0^{22} & E_0^{32} \\ E_5^{13} & E_5^{23} & E_2^{13} + E_5^{33} & E_2^{23} & E_0^{13} + E_2^{33} & E_0^{23} & E_0^{33} \end{bmatrix} \quad (11)$$

## 1.2. Normalization

In solving the linear rolling shutter essential matrix  $\mathbf{F}$  through linear 20 point algorithm, it is important to implement a proper normalization.

Below we describe two approaches for performing such a normalization: 1) Normalizing the image coordinates data  $(u_i, v_i)$  and  $(u'_i, v'_i)$  in the way as described in [1]. 2) Under the linear rolling shutter relative pose formulation, the inputs are monomials  $(u_i^2, u_i v_i, u_i, v_i, 1)$  and  $(u'_i, u'_i v'_i, u'_i, v'_i, 1)$ , a better normalization should be defined on  $(u_i^2, u_i v_i, u_i, v_i, 1)$  and  $(u'_i, u'_i v'_i, u'_i, v'_i, 1)$  rather than  $(u_i, v_i)$  and  $(u'_i, v'_i)$ . Therefore, in this paper, we propose to normalize  $(u_i^2, u_i v_i, u_i, v_i, 1)$  and  $(u'_i, u'_i v'_i, u'_i, v'_i, 1)$  in the way as in [1].

## 2. Details about recovering the atomic essential matrices from a $5 \times 5$ linear RS essential matrix

Once a  $5 \times 5$  linear RS essential matrix  $\mathbf{F}$  is found, our next step is to recover the individual atomic essential matrices  $\mathbf{E}_0, \mathbf{E}_1$  and  $\mathbf{E}_2$ . In the main paper we derived 21 linear equations defined on the three essential matrices. Because these three essential matrices contain 27 elements, we need six extra constraints to solve for  $\mathbf{E}_0, \mathbf{E}_1$  and  $\mathbf{E}_2$ . To this end, we resort to the inherent constraints on the standard  $3 \times 3$  essential matrices, *e.g.*  $\det(\mathbf{E}) = 0$  and  $2\mathbf{E}\mathbf{E}^T\mathbf{E} - \text{Tr}(\mathbf{E}\mathbf{E}^T)\mathbf{E} = 0$ , since  $\mathbf{E}_0, \mathbf{E}_1$  and  $\mathbf{E}_2$  are standard  $3 \times 3$  essential matrices. Note that these non-linear constraints generally give rise to cubic (3-order) equations. Next we will show how to reduce them to quadratic ones.

### 2.1. Enforcing inherent constraints on the atomic essential matrices

**Theorem 1.** *A real nonzero  $3 \times 3$  matrix  $\mathbf{E}$  is a fundamental matrix if and only if it satisfy the equation:*

$$\det(\mathbf{E}) = 0. \quad (12)$$

**Theorem 2.** *A real nonzero  $3 \times 3$  matrix  $\mathbf{E}$  is an essential matrix if and only if it satisfies the equation:*

$$\mathbf{E}\mathbf{E}^T\mathbf{E} - \frac{1}{2}\text{trace}(\mathbf{E}\mathbf{E}^T)\mathbf{E} = 0. \quad (13)$$

**Theorem 3.** *If three essential matrices  $\mathbf{E}_0, \mathbf{E}_1, \mathbf{E}_2$  consists of a common rotation, i.e.,  $\mathbf{E}_0 = [\mathbf{t}] \times \mathbf{R}$ ,  $\mathbf{E}_1 = [\mathbf{t}_1] \times \mathbf{R}$ ,  $\mathbf{E}_2 = [\mathbf{t}_2] \times \mathbf{R}$ , the column reorganized matrices  $\mathbf{F}_1 = [\mathbf{E}_0^1, \mathbf{E}_1^1, \mathbf{E}_2^1]$ ,  $\mathbf{F}_2 = [\mathbf{E}_0^2, \mathbf{E}_1^2, \mathbf{E}_2^2]$ ,  $\mathbf{F}_3 = [\mathbf{E}_0^3, \mathbf{E}_1^3, \mathbf{E}_2^3]$  are rank deficient.*

$$\det(\mathbf{F}_1) = 0, \det(\mathbf{F}_2) = 0, \det(\mathbf{F}_3) = 0. \quad (14)$$

*Proof.* According to the definition,  $\mathbf{F}_1 = [\mathbf{E}_0^1, \mathbf{E}_1^1, \mathbf{E}_2^1] = [\mathbf{t} \times \mathbf{R}^1, \mathbf{t}_1 \times \mathbf{R}^1, \mathbf{t}_2 \times \mathbf{R}^1]$ . Therefore, all the rows of  $\mathbf{F}_1$  are orthogonal to  $\mathbf{R}^1$ , we must have  $\text{rank}(\mathbf{F}_1) = 2$  or  $\det(\mathbf{F}_1) = 0$ . Similarly, we have  $\det(\mathbf{F}_2) = 0$  and  $\det(\mathbf{F}_3) = 0$ .  $\square$

Note that  $\mathbf{F}_1, \mathbf{F}_2$  and  $\mathbf{F}_3$  are not necessarily an essential matrix.

By collecting the rank deficient constraints on essential matrices  $\mathbf{E}_0, \mathbf{E}_1, \mathbf{E}_2$  and column reorganized matrices  $\mathbf{F}_1, \mathbf{F}_2, \mathbf{F}_3$ . In total, we have the following 6 rank constraints:

$$\begin{aligned} \text{rank}(\mathbf{E}_0) &= \text{rank}([\mathbf{t}] \times \mathbf{R}) = 2, \\ \text{rank}(\mathbf{E}_1) &= \text{rank}([\mathbf{v}_1] \times \mathbf{R}) = 2, \\ \text{rank}(\mathbf{E}_2) &= \text{rank}([\mathbf{v}_2] \times \mathbf{R}) = 2, \\ \text{rank}(\mathbf{F}_1) &= \text{rank}([\mathbf{E}_0^1, \mathbf{E}_1^1, \mathbf{E}_2^1]) = 2, \\ \text{rank}(\mathbf{F}_2) &= \text{rank}([\mathbf{E}_0^2, \mathbf{E}_1^2, \mathbf{E}_2^2]) = 2, \\ \text{rank}(\mathbf{F}_3) &= \text{rank}([\mathbf{E}_0^3, \mathbf{E}_1^3, \mathbf{E}_2^3]) = 2. \end{aligned} \quad (15)$$

By enforcing the above six constraints together with the 21 linear equations, the atomic essential matrices  $\mathbf{E}_0, \mathbf{E}_1$  and  $\mathbf{E}_2$  can be recovered. Besides the rank constraints, the cubic equations defined on the essential matrix also constrain  $\mathbf{E}_0, \mathbf{E}_1$  and  $\mathbf{E}_2$ . By exploiting the special structure of these essential matrices, we could reach the following method which involves quadratic equations only.

## References

- [1] R. Hartley. In defense of the eight-point algorithm. *IEEE Trans. Pattern Anal. Mach. Intell.*, 19(6):580–593, Jun 1997.
